# Supplementary material for: Nitrate and/or Nitric Acid Formation in the Presence of Different Radical Scavengers during Ozonation of Water Samples; Are Scavengers Effective?
Source: MDPI journal article supplement (doi:10.3390/w15101840), 2023-05-11
Supplement: s1 [file s1]

## Appendix A: Supplementary data

# Nitrate and/or Nitric Acid Formation in the Presence of Different Radical Scavengers during Ozonation of Water Samples; Are Scavengers Effective?

Ulker D. Keris-Sen <sup>1</sup> and Taner Yonar <sup>2,\*</sup>

<sup>1</sup> Institute of Earth and Marine Sciences, Gebze Technical University, Gebze 41400, Kocaeli, Turkey; udkeris@gtu.edu.tr

<sup>2</sup> Department of Environmental Engineering, Bursa Uludag University, Nilufer 16059, Bursa, Turkey

\* Correspondence: yonar@uludag.edu.tr

Table S1. The ANOVA results for linear regression.

|                                 |       | Degree of freedom | Sum of Squares | Mean Square | F Value  | Prob>F  |
|---------------------------------|-------|-------------------|----------------|-------------|----------|---------|
| UPW                             | Model | 1                 | 99964.58334    | 99964.58334 | 535.5287 | <0.0001 |
|                                 | Error | 4                 | 746.66088      | 186.66522   |          |         |
|                                 | Total | 5                 | 100711.2442    |             |          |         |
| Tap water                       | Model | 1                 | 112992.773     | 112992.773  | 324.6853 | <0.0001 |
|                                 | Error | 4                 | 1392.02821     | 348.00705   |          |         |
|                                 | Total | 5                 | 114384.8012    |             |          |         |
| KSW                             | Model | 1                 | 112846.9029    | 112846.9029 | 1204.571 | <0.0001 |
|                                 | Error | 4                 | 374.72901      | 93.68225    |          |         |
|                                 | Total | 5                 | 113221.632     |             |          |         |
| NaOH                            | Model | 1                 | 110135.5936    | 110135.5936 | 1507.166 | <0.0001 |
|                                 | Error | 4                 | 292.29847      | 73.07462    |          |         |
|                                 | Total | 5                 | 110427.892     |             |          |         |
| Na <sub>2</sub> CO <sub>3</sub> | Model | 1                 | 88973.4014     | 88973.4014  | 437.0518 | <0.0001 |
|                                 | Error | 4                 | 814.30527      | 203.57632   |          |         |
|                                 | Total | 5                 | 89787.70667    |             |          |         |
| NaHCO <sub>3</sub>              | Model | 1                 | 101214.5258    | 101214.5258 | 443.0787 | <0.0001 |
|                                 | Error | 4                 | 913.73851      | 228.43463   |          |         |
|                                 | Total | 5                 | 102128.2643    |             |          |         |
| H <sub>3</sub> PO <sub>4</sub>  | Model | 1                 | 90763.97156    | 90763.97156 | 3861.147 | <0.0001 |
|                                 | Error | 4                 | 94.02799       | 23.507      |          |         |
|                                 | Total | 5                 | 90857.99955    |             |          |         |
| HCl                             | Model | 1                 | 106700.3374    | 106700.3374 | 2708.524 | <0.0001 |
|                                 | Error | 4                 | 157.57713      | 39.39428    |          |         |
|                                 | Total | 5                 | 106857.9145    |             |          |         |
| NaCl                            | Model | 1                 | 100803.317     | 100803.317  | 2871.253 | <0.0001 |
|                                 | Error | 4                 | 140.43113      | 35.10778    |          |         |
|                                 | Total | 5                 | 100943.7481    |             |          |         |
| CaCl <sub>2</sub>               | Model | 1                 | 85168.1062     | 85168.1062  | 717.5339 | <0.0001 |
|                                 | Error | 4                 | 474.78237      | 118.69559   |          |         |
|                                 | Total | 5                 | 85642.88858    |             |          |         |

Table S2. The statistical Welch's test results for nitrate concentrations in the presence of different scavengers at the initial condition.

| <sup>1</sup> DF Number         | <sup>1</sup> DF Den | F-Value  | P-Value  |
|--------------------------------|---------------------|----------|----------|
| 9                              | 9,51712             | 724,8405 | 7,15E-13 |
| <sup>1</sup> degree of freedom |                     |          |          |

Table S3. Games-Howell Pairwise Comparisons obtained from the One-Way Welch's ANOVA for nitrate concentrations in the presence of different scavengers at the initial condition.

|                                                                  | Mean Diff | SE      | T-Value  | Prob     | Alpha | Sig | LCL      | UCL      |
|------------------------------------------------------------------|-----------|---------|----------|----------|-------|-----|----------|----------|
| Tap water - UPW                                                  | 0.6181    | 0.03707 | 16.67442 | --       | 0.05  | 1   | --       | --       |
| KSW - UPW                                                        | 2.39069   | 0.0231  | 103.487  | 0.01678  | 0.05  | 1   | 1.58912  | 3.19226  |
| KSW - Tap water                                                  | 1.77259   | 0.04368 | 40.58294 | 0.00706  | 0.05  | 1   | 1.22627  | 2.31891  |
| NaOH - UPW                                                       | 0.05172   | 0.00995 | 5.19615  | 0.16692  | 0.05  | 0   | -0.04674 | 0.15019  |
| NaOH - Tap water                                                 | -0.56638  | 0.03838 | -14.7563 | 0.09092  | 0.05  | 0   | -1.52358 | 0.39082  |
| NaOH - KSW                                                       | -2.33897  | 0.02515 | -92.9831 | 0.00484  | 0.05  | 1   | -2.76932 | -1.90862 |
| Na <sub>2</sub> CO <sub>3</sub> - UPW                            | 0.06897   | 0       | --       | --       | 0.05  | 1   | --       | --       |
| Na <sub>2</sub> CO <sub>3</sub> - Tap water                      | -0.54914  | 0.03707 | -14.814  | --       | 0.05  | 1   | --       | --       |
| Na <sub>2</sub> CO <sub>3</sub> - KSW                            | -2.32173  | 0.0231  | -100.502 | 0.01727  | 0.05  | 1   | -3.1233  | -1.52015 |
| Na <sub>2</sub> CO <sub>3</sub> - NaOH                           | 0.01724   | 0.00995 | 1.73205  | 0.75263  | 0.05  | 0   | -0.08122 | 0.11571  |
| NaHCO <sub>3</sub> - UPW                                         | 0.0805    | 0.0015  | 53.59335 | --       | 0.05  | 1   | --       | --       |
| NaHCO <sub>3</sub> - Tap water                                   | -0.5376   | 0.0371  | -14.4908 | 0.1186   | 0.05  | 0   | -1.81395 | 0.73874  |
| NaHCO <sub>3</sub> - KSW                                         | -2.31019  | 0.02315 | -99.7915 | 0.01687  | 0.05  | 1   | -3.0961  | -1.52428 |
| NaHCO <sub>3</sub> - NaOH                                        | 0.02878   | 0.01007 | 2.85864  | 0.4293   | 0.05  | 0   | -0.06582 | 0.12337  |
| NaHCO <sub>3</sub> - Na <sub>2</sub> CO <sub>3</sub>             | 0.01154   | 0.0015  | 7.68034  | --       | 0.05  | 1   | --       | --       |
| H <sub>3</sub> PO <sub>4</sub> - UPW                             | 0.12069   | 0       | --       | --       | 0.05  | 1   | --       | --       |
| H <sub>3</sub> PO <sub>4</sub> - Tap water                       | -0.49741  | 0.03707 | -13.4186 | --       | 0.05  | 1   | --       | --       |
| H <sub>3</sub> PO <sub>4</sub> - KSW                             | -2.27     | 0.0231  | -98.2626 | 0.01767  | 0.05  | 1   | -3.07157 | -1.46843 |
| H <sub>3</sub> PO <sub>4</sub> - NaOH                            | 0.06897   | 0.00995 | 6.9282   | 0.09861  | 0.05  | 0   | -0.0295  | 0.16743  |
| H <sub>3</sub> PO <sub>4</sub> - Na <sub>2</sub> CO <sub>3</sub> | 0.05172   | 0       | --       | --       | 0.05  | 1   | --       | --       |
| H <sub>3</sub> PO <sub>4</sub> - NaHCO <sub>3</sub>              | 0.04019   | 0.0015  | 26.75441 | --       | 0.05  | 1   | --       | --       |
| HCl - UPW                                                        | 1.03448   | 0       | --       | --       | 0.05  | 1   | --       | --       |
| HCl - Tap water                                                  | 0.41638   | 0.03707 | 11.23256 | --       | 0.05  | 1   | --       | --       |
| HCl - KSW                                                        | -1.35621  | 0.0231  | -58.7068 | 0.02957  | 0.05  | 1   | -2.15778 | -0.55464 |
| HCl - NaOH                                                       | 0.98276   | 0.00995 | 98.7269  | 5.18E-04 | 0.05  | 1   | 0.88429  | 1.08122  |
| HCl - Na <sub>2</sub> CO <sub>3</sub>                            | 0.96552   | 0       | --       | --       | 0.05  | 1   | --       | --       |
| HCl - NaHCO <sub>3</sub>                                         | 0.95398   | 0.0015  | 635.1017 | --       | 0.05  | 1   | --       | --       |
| HCl - H <sub>3</sub> PO <sub>4</sub>                             | 0.91379   | 0       | --       | --       | 0.05  | 1   | --       | --       |
| NaCl - UPW                                                       | 0.86207   | 0       | --       | --       | 0.05  | 1   | --       | --       |
| NaCl - Tap water                                                 | 0.24397   | 0.03707 | 6.5814   | --       | 0.05  | 1   | --       | --       |
| NaCl - KSW                                                       | -1.52862  | 0.0231  | -66.1702 | 0.02623  | 0.05  | 1   | -2.3302  | -0.72705 |
| NaCl - NaOH                                                      | 0.81034   | 0.00995 | 81.40639 | 7.62E-04 | 0.05  | 1   | 0.71188  | 0.90881  |
| NaCl - Na <sub>2</sub> CO <sub>3</sub>                           | 0.7931    | 0       | --       | --       | 0.05  | 1   | --       | --       |
| NaCl - NaHCO <sub>3</sub>                                        | 0.78157   | 0.0015  | 520.3192 | --       | 0.05  | 1   | --       | --       |
| NaCl - H <sub>3</sub> PO <sub>4</sub>                            | 0.74138   | 0       | --       | --       | 0.05  | 1   | --       | --       |
| NaCl - HCl                                                       | -0.17241  | 0       | --       | --       | 0.05  | 1   | --       | --       |
| CaCl <sub>2</sub> - UPW                                          | 0.58621   | 0.27586 | 2.125    | --       | 0.05  | 1   | --       | --       |
| CaCl <sub>2</sub> - Tap water                                    | -0.0319   | 0.27834 | -0.1146  | 1        | 0.05  | 0   | -8.85243 | 8.78864  |
| CaCl <sub>2</sub> - KSW                                          | -1.80448  | 0.27683 | -6.51844 | 0.25703  | 0.05  | 0   | -11.0701 | 7.46113  |
| CaCl <sub>2</sub> - NaOH                                         | 0.53448   | 0.27604 | 1.93624  | 0.71945  | 0.05  | 0   | -8.979   | 10.04797 |
| CaCl <sub>2</sub> - Na <sub>2</sub> CO <sub>3</sub>              | 0.51724   | 0.27586 | 1.875    | --       | 0.05  | 1   | --       | --       |
| CaCl <sub>2</sub> - NaHCO <sub>3</sub>                           | 0.5057    | 0.27587 | 1.83315  | 0.74374  | 0.05  | 0   | -9.06484 | 10.07624 |
| CaCl <sub>2</sub> - H <sub>3</sub> PO <sub>4</sub>               | 0.46552   | 0.27586 | 1.6875   | --       | 0.05  | 1   | --       | --       |
| CaCl <sub>2</sub> - HCl                                          | -0.44828  | 0.27586 | -1.625   | --       | 0.05  | 1   | --       | --       |
| CaCl <sub>2</sub> - NaCl                                         | -0.27586  | 0.27586 | -1       | --       | 0.05  | 1   | --       | --       |

SE: Standard error of the mean

Sig: Significance degree, "1" is significant while "0" is non-significant

LCL: Lower Confidence Limits

UCL: Upper Confidence Limits

Table S4. The statistical Welch's test results for nitrate formations in the presence of different scavengers at the final condition.

| <sup>1</sup> DF Number         | <sup>1</sup> DF Den | F-Value     | P-Value     |
|--------------------------------|---------------------|-------------|-------------|
| 9                              | 4.5017              | 17041.72429 | 1.12999E-10 |
| <sup>1</sup> degree of freedom |                     |             |             |

Table S5. Games-Howell Pairwise Comparisons obtained from the One-Way Welch's ANOVA for nitrate formations in the presence of different scavengers at the final condition.

|                                                                  | Mean Diff | SE <sup>1</sup> | T-Value  | Prob     | Alpha | Sig <sup>2</sup> | LCL       | UCL      |
|------------------------------------------------------------------|-----------|-----------------|----------|----------|-------|------------------|-----------|----------|
| Tap water - UPW                                                  | 26.79501  | 14.77413        | 1.81364  | 0.72528  | 0.05  | 0                | -119.262  | 172.8525 |
| KSW - UPW                                                        | 14.1676   | 14.82239        | 0.95582  | 0.96912  | 0.05  | 0                | -130.131  | 158.4662 |
| KSW - Tap water                                                  | -12.6274  | 1.23758         | -10.2033 | 0.15316  | 0.05  | 0                | -48.8934  | 23.63859 |
| NaOH - UPW                                                       | 16.51277  | 15.04759        | 1.09737  | 0.94461  | 0.05  | 0                | -120.446  | 153.4717 |
| NaOH - Tap water                                                 | -10.2822  | 2.87373         | -3.57802 | 0.31055  | 0.05  | 0                | -38.2908  | 17.72628 |
| NaOH - KSW                                                       | 2.34517   | 3.11236         | 0.7535   | 0.99315  | 0.05  | 0                | -20.9716  | 25.66192 |
| Na <sub>2</sub> CO <sub>3</sub> - UPW                            | -5.4045   | 14.78189        | -0.36562 | 0.99994  | 0.05  | 0                | -151.173  | 140.3641 |
| Na <sub>2</sub> CO <sub>3</sub> - Tap water                      | -32.1995  | 0.57664         | -55.8403 | 0.01062  | 0.05  | 1                | -42.4263  | -21.9728 |
| Na <sub>2</sub> CO <sub>3</sub> - KSW                            | -19.5721  | 1.32702         | -14.7489 | 0.06285  | 0.05  | 0                | -42.7488  | 3.60458  |
| Na <sub>2</sub> CO <sub>3</sub> - NaOH                           | -21.9173  | 2.91336         | -7.52301 | 0.07489  | 0.05  | 0                | -48.6537  | 4.81918  |
| NaHCO <sub>3</sub> - UPW                                         | 1070920   | 1070911         | 1.00001  | 0.94467  | 0.05  | 0                | -3.61E+07 | 3.82E+07 |
| NaHCO <sub>3</sub> - Tap water                                   | 1070893   | 1070911         | 0.99998  | 0.94467  | 0.05  | 0                | -3.61E+07 | 3.82E+07 |
| NaHCO <sub>3</sub> - KSW                                         | 1070906   | 1070911         | 0.99999  | 0.94467  | 0.05  | 0                | -3.61E+07 | 3.82E+07 |
| NaHCO <sub>3</sub> - NaOH                                        | 1070903   | 1070911         | 0.99999  | 0.94467  | 0.05  | 0                | -3.61E+07 | 3.82E+07 |
| NaHCO <sub>3</sub> - Na <sub>2</sub> CO <sub>3</sub>             | 1070925   | 1070911         | 1.00001  | 0.94467  | 0.05  | 0                | -3.61E+07 | 3.82E+07 |
| H <sub>3</sub> PO <sub>4</sub> - UPW                             | -8.32273  | 14.7724         | -0.5634  | 0.99853  | 0.05  | 0                | -154.445  | 137.7994 |
| H <sub>3</sub> PO <sub>4</sub> - Tap water                       | -35.1177  | 0.22826         | -153.851 | 0.01037  | 0.05  | 1                | -42.629   | -27.6065 |
| H <sub>3</sub> PO <sub>4</sub> - KSW                             | -22.4903  | 1.21679         | -18.4834 | 0.09354  | 0.05  | 0                | -64.631   | 19.65034 |
| H <sub>3</sub> PO <sub>4</sub> - NaOH                            | -24.8355  | 2.86483         | -8.66909 | 0.06445  | 0.05  | 0                | -53.1689  | 3.49793  |
| H <sub>3</sub> PO <sub>4</sub> - Na <sub>2</sub> CO <sub>3</sub> | -2.91824  | 0.53054         | -5.50046 | 0.30511  | 0.05  | 0                | -21.146   | 15.30951 |
| H <sub>3</sub> PO <sub>4</sub> - NaHCO <sub>3</sub>              | -1070928  | 1070911         | -1.00002 | 0.94467  | 0.05  | 0                | -3.82E+07 | 3.61E+07 |
| HCl - UPW                                                        | 6.33244   | 14.7724         | 0.42867  | 0.99979  | 0.05  | 0                | -139.79   | 152.4545 |
| HCl - Tap water                                                  | -20.4626  | 0.22826         | -89.6467 | 0.01799  | 0.05  | 1                | -27.9738  | -12.9514 |
| HCl - KSW                                                        | -7.83516  | 1.21679         | -6.43923 | 0.26342  | 0.05  | 0                | -49.9758  | 34.30552 |
| HCl - NaOH                                                       | -10.1803  | 2.86483         | -3.55355 | 0.31629  | 0.05  | 0                | -38.5138  | 18.1531  |
| HCl - Na <sub>2</sub> CO <sub>3</sub>                            | 11.73694  | 0.53054         | 22.12245 | 0.07769  | 0.05  | 0                | -6.49081  | 29.96469 |
| HCl - NaHCO <sub>3</sub>                                         | -1070913  | 1070911         | -1       | 0.94467  | 0.05  | 0                | -3.82E+07 | 3.61E+07 |
| HCl - H <sub>3</sub> PO <sub>4</sub>                             | 14.65517  | 0.03271         | 447.9998 | 2.06E-05 | 0.05  | 1                | 14.33159  | 14.97875 |
| NaCl - UPW                                                       | 8.91865   | 14.7724         | 0.60374  | 0.99768  | 0.05  | 0                | -137.203  | 155.0407 |
| NaCl - Tap water                                                 | -17.8764  | 0.22826         | -78.3165 | 0.02065  | 0.05  | 1                | -25.3876  | -10.3652 |
| NaCl - KSW                                                       | -5.24895  | 1.21679         | -4.31379 | 0.38283  | 0.05  | 0                | -47.3896  | 36.89172 |
| NaCl - NaOH                                                      | -7.59412  | 2.86483         | -2.65081 | 0.48229  | 0.05  | 0                | -35.9276  | 20.73931 |
| NaCl - Na <sub>2</sub> CO <sub>3</sub>                           | 14.32314  | 0.53054         | 26.99709 | 0.06366  | 0.05  | 0                | -3.90461  | 32.55089 |
| NaCl - NaHCO <sub>3</sub>                                        | -1070911  | 1070911         | -1       | 0.94467  | 0.05  | 0                | -3.82E+07 | 3.61E+07 |
| NaCl - H <sub>3</sub> PO <sub>4</sub>                            | 17.24138  | 0.03271         | 527.0585 | 1.77E-05 | 0.05  | 1                | 16.9178   | 17.56496 |
| NaCl - HCl                                                       | 2.58621   | 0.03271         | 79.05878 | 8.08E-04 | 0.05  | 1                | 2.26263   | 2.90979  |
| CaCl <sub>2</sub> - UPW                                          | -1.22223  | 17.91816        | -0.06821 | 1        | 0.05  | 0                | -121.177  | 118.7322 |
| CaCl <sub>2</sub> - Tap water                                    | -28.0172  | 10.14342        | -2.76211 | 0.55959  | 0.05  | 0                | -379.056  | 323.022  |
| CaCl <sub>2</sub> - KSW                                          | -15.3898  | 10.21359        | -1.5068  | 0.82447  | 0.05  | 0                | -344.877  | 314.0972 |
| CaCl <sub>2</sub> - NaOH                                         | -17.735   | 10.53775        | -1.683   | 0.77646  | 0.05  | 0                | -272.655  | 237.1847 |
| CaCl <sub>2</sub> - Na <sub>2</sub> CO <sub>3</sub>              | 4.18227   | 10.15472        | 0.41185  | 0.99947  | 0.05  | 0                | -343.214  | 351.5784 |
| CaCl <sub>2</sub> - NaHCO <sub>3</sub>                           | -1070921  | 1070911         | -1.00001 | 0.94467  | 0.05  | 0                | -3.82E+07 | 3.61E+07 |
| CaCl <sub>2</sub> - H <sub>3</sub> PO <sub>4</sub>               | 7.1005    | 10.1409         | 0.70018  | 0.98762  | 0.05  | 0                | -344.76   | 358.9605 |
| CaCl <sub>2</sub> - HCl                                          | -7.55467  | 10.1409         | -0.74497 | 0.98334  | 0.05  | 0                | -359.415  | 344.3054 |
| CaCl <sub>2</sub> - NaCl                                         | -10.1409  | 10.1409         | -1       | 0.94467  | 0.05  | 0                | -362.001  | 341.7192 |

SE: Standard error of the mean

Sig: Significance degree, "1" is significant while "0" is non-significant

LCL: Lower Confidence Limits

UCL: Upper Confidence Limits
